# Supplementary material
Source: MDPI journal article supplement (https://www.mdpi.com/2227-9040/11/2/117)
Supplement: s1 [file s1]

# Selective Label-Free electrochemical Aptasensor based on Carbon-Nanotubes for Carbendazim Detection

**Constanza J. Venegas\*, Luna Rodríguez, Paulina Sierra-Rosales\***

Programa Institucional de Fomento a la Investigación, Desarrollo e Innovación, Universidad Tecnológica Metropolitana,  
Ignacio Valdivieso 2409, P.O Box 8940577, San Joaquín, Santiago, Chile. [cvenegasa@utem.cl](mailto:cvenegasa@utem.cl)  
Correspondence: [cvenegasa@utem.cl](mailto:cvenegasa@utem.cl), [psierra@utem.cl](mailto:psierra@utem.cl)

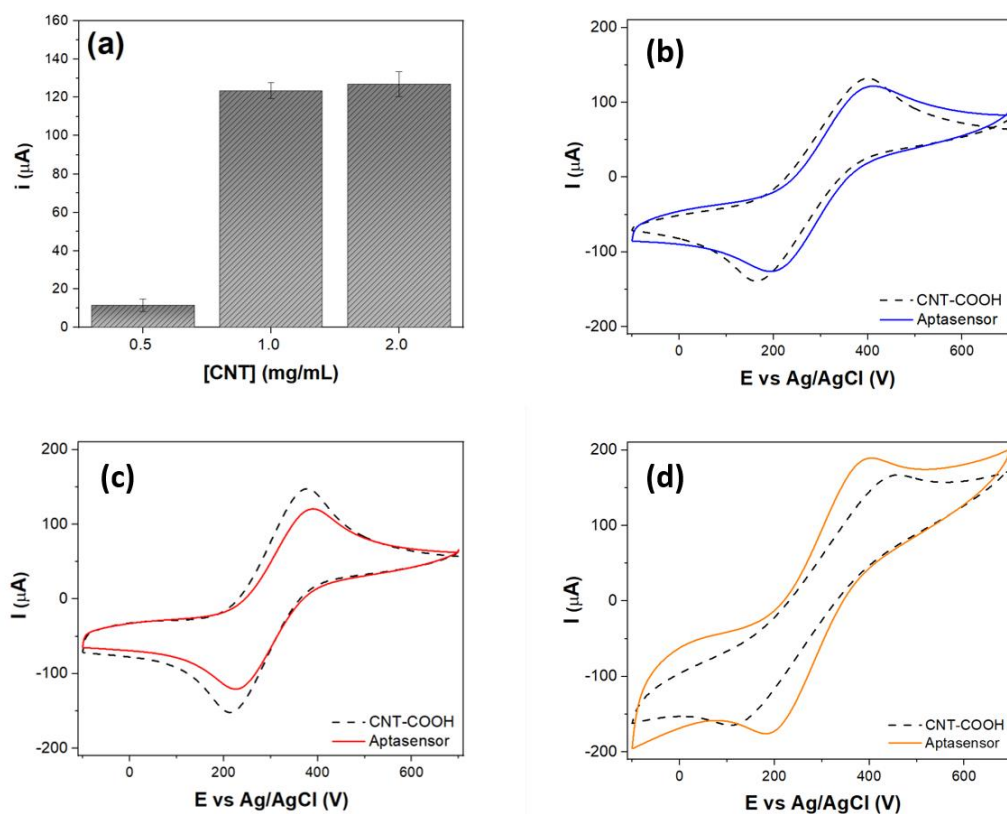

**Figure S1.** (a) Optimization of the concentration of CNT in the dispersion with Nafion 0.2% obtained from fig.1a; (b-d) Cyclic voltammograms of 5 mM  $[\text{Fe}(\text{CN})_6]^{3-/4-}$  in PBS 0.1 M at pH 7.4 for electrodes modified with dispersions of CNT-COOH in Nafion 0.2%, and aptasensors constructed with different CNT concentrations: (b) 0.5 mg/mL; (c) 1 mg/mL, and (d) 2.0 mg/mL. Aptamer concentration = 10 μM.

**Table S1.** Current and differential potentials obtained from figure S1. All measurements were performed in triplicate.

| CNT concentration (mg/mL) | $I_{pa}$ (μA)   | $\Delta E_p$ (mV) | RSD (%) |
|---------------------------|-----------------|-------------------|---------|
| 0.5                       | $113.2 \pm 2.7$ | $202.3 \pm 12.0$  | 2.9     |
| 1.0                       | $131.0 \pm 4.9$ | $173.6 \pm 10.6$  | 3.2     |
| 2.0                       | $148.9 \pm 0.7$ | $210.5 \pm 17.7$  | 5.0     |

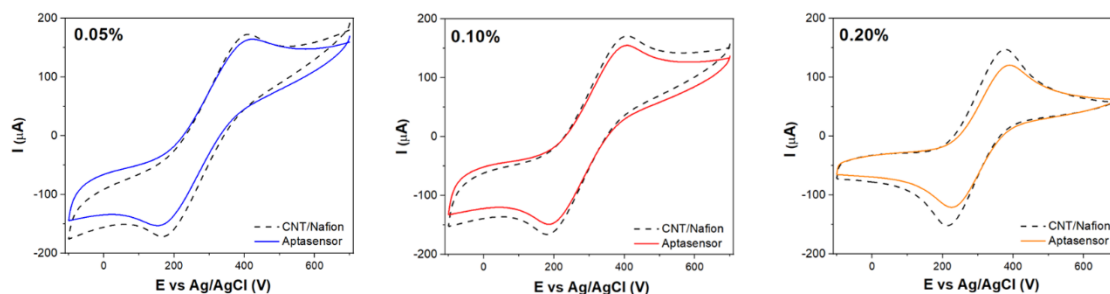

**Figure S2.** Cyclic voltammograms of 5 mM  $[\text{Fe}(\text{CN})_6]^{3-/4-}$  in PBS 0.1 M at pH 7.4 for electrodes modified with dispersions of CNT-COOH in different Nafion concentrations and aptasensors constructed with different Nafion concentrations. Aptamer concentration = 10  $\mu\text{M}$ .

**Table S2.** Current and differential of potentials obtained for figure S2. All measurements were performed in triplicate.

| Nafion concentration (% v/v) | $I_{pa}$ ( $\mu\text{A}$ ) | $\Delta E_p$ (mV) | RSD (%) |
|------------------------------|----------------------------|-------------------|---------|
| 0.05                         | $107.0 \pm 9.0$            | $228.6 \pm 13.5$  | 8.4     |
| 0.1                          | $126.6 \pm 5.0$            | $222.6 \pm 5.8$   | 3.9     |
| 0.2                          | $131.2 \pm 4.9$            | $173.6 \pm 10.6$  | 3.7     |

**Table S3.** Current and differential potentials obtained with the activation of -COOH by EDC/NHS reaction. All measurements were performed in triplicate.

| Time EDC/NHS reaction (h) | $I_{pa}$ ( $\mu\text{A}$ ) | $\Delta E_p$ (mV) | RSD (%) |
|---------------------------|----------------------------|-------------------|---------|
| 1                         | $131.1 \pm 4.9$            | $173.6 \pm 10.6$  | 3.2     |
| 2                         | $134.0 \pm 17.3$           | $231.6 \pm 7.6$   | 9.8     |

**Table S4.** Current and differential potentials obtained with the different concentrations of the aptamer. All measurements were performed in triplicate.

| AP Concentration | $I_{pa}$ ( $\mu\text{A}$ ) | $\Delta E_p$ (mV) | RSD (%) |
|------------------|----------------------------|-------------------|---------|
| 1 $\mu\text{M}$  | $102.9 \pm 3.4$            | $236.3 \pm 2.3$   | 2.8%    |
| 5 $\mu\text{M}$  | $99.7 \pm 10.5$            | $245.0 \pm 16.8$  | 10.9%   |
| 10 $\mu\text{M}$ | $94.4 \pm 0.2$             | $248.3 \pm 2.5$   | 0.2%    |
| 20 $\mu\text{M}$ | $97.6 \pm 16.8$            | $237.6 \pm 25.7$  | 16%     |

**Table S5.** Current and differential potentials obtained with the different incubation times of the aptamer. All measurements were performed in triplicate.

| Incubation time (h) | $I_{pa}$ ( $\mu\text{A}$ ) | $\Delta E_p$ (mV) | RSD (%) |
|---------------------|----------------------------|-------------------|---------|
| 1                   | $123.8 \pm 1.8$            | $187.6 \pm 7.6$   | 1.2     |
| 5                   | $120.6 \pm 3.8$            | $208 \pm 7.5$     | 2.4     |

|    |           |           |     |
|----|-----------|-----------|-----|
| 12 | 94.6±2.8  | 218.6±4.9 | 2.3 |
| 24 | 102.6±5.5 | 232.2±5.5 | 4.0 |

**Table S6.** Effect of the electrode used for the construction of the aptasensor under optimized conditions

| Electrode | $I_{pa}$ ( $\mu A$ ) | $\Delta E_p$ (mV) | RSD  |
|-----------|----------------------|-------------------|------|
| SPAuNPE   | 94.6±2.8             | 218.6±4.9         | 2.3% |
| SPCE      | 90.2±4.7             | 252.6±9.6         | 3.6% |

**Table S7.** Current and differential potentials obtained with the different binding times of CBZ. All measurements were performed in triplicate.

| Binding time (min) | $I_{pa}$ ( $\mu A$ ) | $\Delta E_p$ (mV) | CV    |
|--------------------|----------------------|-------------------|-------|
| 5                  | 113.0±18.2           | 252.0±5.6         | 16.1% |
| 30                 | 27.5±2.5             | 218.6±2.3         | 9.0%  |
| 60                 | 26.7±2.4             | 217.3±2.3         | 8.9%  |
| 120                | 38.5±4.7             | 218.6±2.3         | 12.2% |

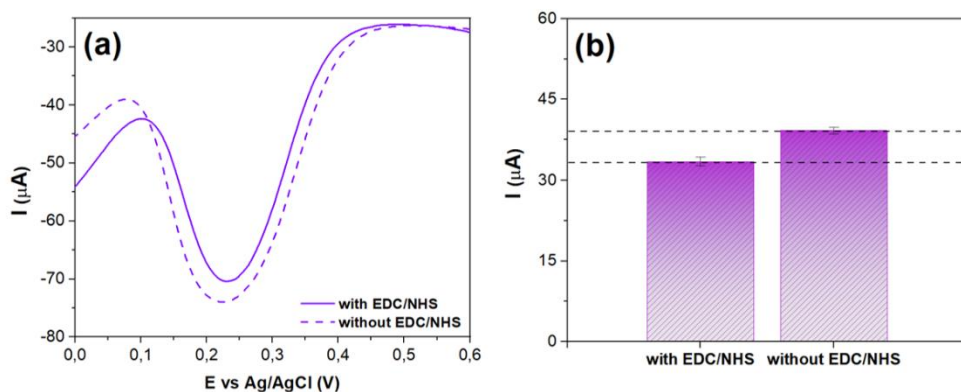

**Figure S3.** Effect of the presence and absence of EDC/NHS in the activation of -COOH to achieve the aptamer's covalent immobilization. (a) Differential pulse voltammograms of aptasensors with 10 nM CBZ in 5.0 mM  $[Fe(CN)_6]^{4-/3-}$  in 0.1 M PBS + 0.1 M KCl (pH 7.4), and (b) bar graph from (a). All measurements were performed in triplicate.
